# Supplementary material
Source: Springer Nature journal article supplement (https://www.springermedizin.de/resource/supplementary/12936_2006_245_MOESM24_ESM.pdf/9547286)

94-  
68-  
43-  
30-  
20-  
14-

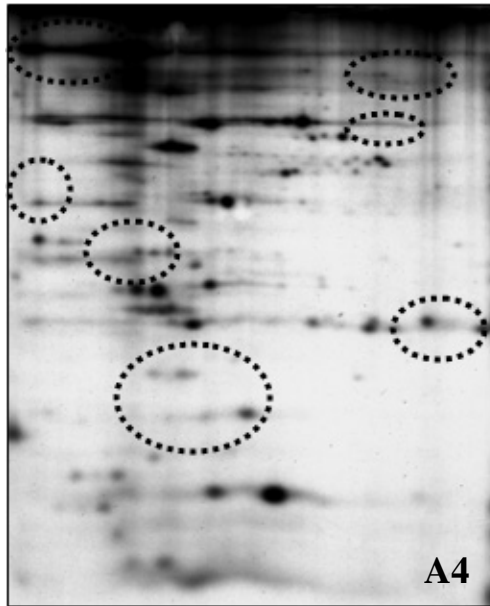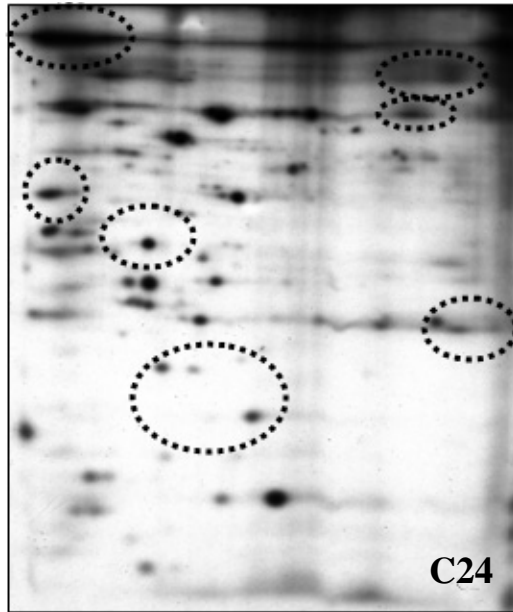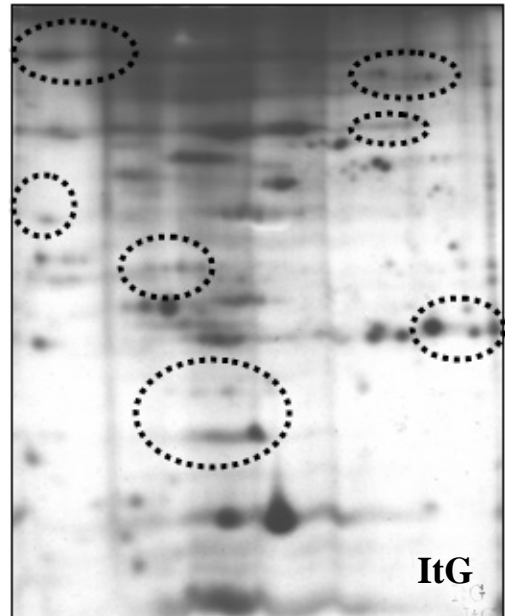

Supplement: MOESM24 [file 9547286]
